# Supplementary material for: Forward genetics in C. elegans reveals genetic adaptations to polyunsaturated fatty acid deficiency
Source: eLife. 2025 Jul 8;13:RP104181. doi: 10.7554/eLife.104181 (PMC12237404; doi:10.7554/eLife.104181)
Supplement: Figure 3—source data 1. [file elife-104181-fig3-data1.xlsx]

## Sheet: Figure_3 and 7
Figures 3 and 7 Lipidomics Dataset.
	Replicate	1	1	1	1	1	1	1	1	1	1	1	1	1	1	1	1	1	1	1	1	1	1	1	1	1	1	1	1	1	1	1	1	1	1	1	1
	Condition	N2	N2	N2	N2	fat-2(wa17)	fat-2(wa17)	fat-2(wa17)	fat-2(wa17)	fat-2(et65)	fat-2(et65)	fat-2(et65)	fat-2(et65)	fat-2(wa17);egl-9(et60)	fat-2(wa17);egl-9(et60)	fat-2(wa17);egl-9(et60)	fat-2(wa17);egl-9(et60)	fat-2(wa17);hif-1(et69)	fat-2(wa17);hif-1(et69)	fat-2(wa17);hif-1(et69)	fat-2(wa17);hif-1(et69)	fat-2(wa17);ftn-2(et68)	fat-2(wa17);ftn-2(et68)	fat-2(wa17);ftn-2(et68)	fat-2(wa17);ftn-2(et68)	fat-2(wa17) LA	fat-2(wa17) LA	fat-2(wa17) LA	fat-2(wa17) LA	fat-2(wa17) LA to NGM	fat-2(wa17) LA to NGM	fat-2(wa17) LA to NGM	fat-2(wa17) LA to NGM	fat-2(wa17) 25C	fat-2(wa17) 25C	fat-2(wa17) 25C	fat-2(wa17) 25C
	Alt name	N2 s1	N2 s1	N2 s1	N2 s1	fat-2 NGM s1	fat-2 NGM s1	fat-2 NGM s1	fat-2 NGM s1	34.2 s1	34.2 s1	34.2 s1	34.2 s1	5.7 s1	5.7 s1	5.7 s1	5.7 s1	25.7 s1	25.7 s1	25.7 s1	25.7 s1	28.1 s1	28.1 s1	28.1 s1	28.1 s1	fat-2 LA s1	fat-2 LA s1	fat-2 LA s1	fat-2 LA s1	fat-2 LA to NGM s1	fat-2 LA to NGM s1	fat-2 LA to NGM s1	fat-2 LA to NGM s1	fat-2 25C s1	fat-2 25C s1	fat-2 25C s1	fat-2 25C s1
	Sample ID	Sample21	Sample22	Sample23	Sample24	Sample37	Sample38	Sample39	Sample40	Sample01	Sample02	Sample03	Sample04	Sample05	Sample06	Sample07	Sample08	Sample09	Sample10	Sample11	Sample12	Sample25	Sample26	Sample27	Sample28	Sample29	Sample30	Sample31	Sample32	Sample33	Sample34	Sample35	Sample36	Sample41	Sample42	Sample43	Sample44
TYPE	SPECIES
PC_FA	PC_FA 15:0	0.474298	0.493165	0.651825	0.667228	0.474782	0.457718	0.492535	0.873038	0.522916	0.366675	0.442233	0.810273	0.478366	0.350604	0.459402	0.57279	0.341057	0.252485	0.318708	0.413571	0.591051	0.324633	0.3485	0.452982	0.624424	0.830324	0.611591	0.69946	0.578597	0.257713	0.655416	0.606597	0.720097	0.733347	0.609708	0.452658
PC_FA	PC_FA 16:0	0.815189	0.953899	0.980319	1.4255	1.01336	0.61644	0.841157	0.754128	0.753827		1.69577	1.01505	0.911315	1.49492	1.15876	1.49049	1.3717	0.369719	0.806027	0.596646	0.682925	0.895587	1.48819	0.488271	1.00396	0.934971	1.49513	1.32344	1.06883	1.10923	0.76738	0.848221	0.426249	0.498003	0.498617	0.56044
PC_FA	PC_FA 16:1	0.366796	0.24964	0.727191	0.798888	1.2134	1.26899	1.31165	1.01321	0.464977	0.524789	0.638041	0.611912	0.945933	0.832591	0.947094	1.17116	1.26609	1.20139	1.26268	1.1173	0.969543	1.33733	1.16416	0.984708	0.331204	0.604187	0.529762	0.97624	0.552588	0.695159	0.663687	0.454636	0.914384	0.939736	1.05467	0.737471
PC_FA	PC_FA 17:0	2.42921	1.56195	2.34203	1.78324	0.989887	1.17098	1.13968	1.09741	1.25726	1.19268	0.839421	0.889038	0.782196	1.1175	1.08008	0.962182	1.11026	0.964368	0.788612	0.900904	1.27409	0.811114	0.83595	1.74504	1.80188	0.758186	1.49136	1.34877	1.41567	1.2963	1.39928	1.27151	1.53286	2.07007	1.80057	1.99353
PC_FA	PC_FA 17:1	4.11389	5.34968	5.2005	4.81993	4.93785	4.56627	4.987	4.49139	6.39302	7.13567	6.39186	6.3997	7.49845	7.531	7.3264	6.70781	4.83226	6.31719	5.30783	6.54569	4.6758	6.05602	5.27542	3.73612	3.52506	3.80824	3.40096	3.75846	4.1598	4.24283	3.78896	4.52206	4.27587	5.00233	5.1445	5.15571
PC_FA	PC_FA 18:0	1.60342	1.99049	1.76791	2.38892	1.79225	2.08072	1.35695	0.971636	1.84731		1.46343	2.19027	2.36161	2.01162	2.31151	2.55861	0.880853	1.63348	1.75507	1.0452	1.53689	1.64555	1.81467	2.33656	2.80157	2.16008	1.53456	1.8778	2.08556	2.08671	2.59441	1.42294	1.49109	1.38024	1.23729	1.11139
PC_FA	PC_FA 18:1	42.6954	38.7467	42.0492	38.9876	71.9182	73.3964	72.2663	73.7175	60.0274	59.9751	63.3077	59.6409	55.6308	54.7899	54.9919	55.9447	75.2229	70.4812	73.1501	72.3488	70.8632	69.8496	71.2576	73.7118	64.7321	64.0395	64.4398	65.1585	67.3585	62.8475	64.6091	67.3912	71.8004	70.2042	68.3885	70.6766
PC_FA	PC_FA 18:2	6.82928	7.5423	8.10503	7.32412	10.2033	8.26303	9.38852	8.35832	4.58235	4.64081	4.86115	5.48175	6.02879	6.53764	5.28526	4.56365	5.38184	7.26115	6.27487	6.42975	7.50084	7.63124	6.81125	6.77498	5.96407	5.11808	6.11319	6.49806	6.3263	7.01566	6.75713	6.2314	11.5677	11.0038	12.5315	11.3884
PC_FA	PC_FA 18:3	2.36575	2.40943	1.34236	2.3232	0.402867	0.320613	0.24482	0.329408	1.33814	0.932161	1.1175	0.573432	1.10731	0.786097	1.41171	1.1929	0.358409	0.443398	0.386027	0.255152	0.60773	0.632365	0.263377	0.690864	1.44417	1.2202	1.20435	0.765735	0.510213	1.40157	0.405554	0.616539	0.25612	0.24362	0.236923	0.351919
PC_FA	PC_FA 19:1	4.32347	4.80873	4.38999	4.61488	4.22642	4.94925	4.56267	5.38635	4.41738	3.62502	2.79605	3.1288	4.51384	4.25443	4.11329	3.72976	4.03399	4.59423	3.97246	3.34198	3.32937	2.98748	3.25687	2.56034	3.35681	2.30579	2.80555	2.59802	3.40662	4.29338	3.86917	2.82342	4.76288	5.35727	6.31161	4.82821
PC_FA	PC_FA 20:2	0.249708	0.375726	0.0616726	0.303933	0.341166	0.527174	0.56044	0.488679	0.132212	0.0893861	0.0404155	0.0911292	0.142225	0.169596	0.0815376	0.0708691	0.266566	0.138877	0.277563	0.104143	0.219551	0.0958195	0.0741401	0.109434	0.444926	0.310755	0.693164	0.492292	0.613609	0.531334	0.456322	0.348144	0.625055	0.799485	0.740225	0.936898
PC_FA	PC_FA 20:3	2.30002	1.24811	3.01337	2.28472	0.256947	0.0729895	0.432624	0.388643	0.791178	0.542406	0.756703	0.242272	0.901232	1.37091	1.43404	0.883596	0.122301	0.507804	0.254296	0.70402	0.384374	0.265507	0.401504	0.206935	0.750673	1.27297	1.24042	1.34254	0.145676	0.851966	1.05224	0.948683	0.508969	0.357223	0.32603	0.523824
PC_FA	PC_FA 20:4	7.89194	6.85251	5.21265	6.46941	0.176926	0.402956	0.335514	0.291617	2.40674	2.51473	1.27173	2.44236	3.16795	3.01425	2.91399	2.88402	0.0325345	0.886576	0.363063	0.614359	0.513419	0.636936	0.946348	0.668643	2.08111	2.54226	1.90593	1.76337	1.15728	1.77878	1.98141	1.26626	0.182114	0.179956	0.221025	0.208428
PC_FA	PC_FA 20:5	23.5416	27.4176	24.1559	25.8085	2.05265	1.90642	2.08014	1.83873	15.0654	14.9608	14.378	16.4831	15.53	15.7389	16.485	17.2675	4.77921	4.94818	5.08271	5.58245	6.85126	6.83085	6.06202	5.53329	11.138	14.0945	12.5342	11.3973	10.6208	11.5918	11	11.2484	0.936209	1.23073	0.89888	1.07458
PC_CLASS	PC_SFA	5.32212	4.99951	5.74208	6.26488	4.27028	4.32586	3.83033	3.69621	4.38131	1.55936	4.44085	4.90463	4.53349	4.97465	5.00974	5.58407	3.70387	3.22005	3.66841	2.95632	4.08496	3.67688	4.48731	5.02286	6.23183	4.68356	5.13264	5.24946	5.14865	4.74996	5.41648	4.14927	4.1703	4.68167	4.14618	4.11802
PC_CLASS	PC_MUFA	51.4996	49.1548	52.3669	49.2213	82.2959	84.181	83.1276	84.6084	71.3027	71.2606	73.1336	69.7813	68.589	67.408	67.3787	67.5534	85.3553	82.594	83.6931	83.3538	79.8379	80.2304	80.954	80.993	71.9452	70.7577	71.1761	72.4912	75.4775	72.0789	72.9309	75.1913	81.7535	81.5036	80.8993	81.398
PC_CLASS	PC_PUFA	43.1783	45.8457	41.891	44.5139	13.4338	11.4932	13.0421	11.6954	24.316	23.6803	22.4255	25.3141	26.8775	27.6174	27.6115	26.8625	10.9409	14.186	12.6385	13.6899	16.0772	16.0927	14.5586	13.9842	21.823	24.5588	23.6913	22.2593	19.3739	23.1711	21.6526	20.6594	14.0762	13.8148	14.9545	14.484
PE_FA	PE_FA 15:0	1.99923	2.3069	2.4159	2.05658	1.55125	1.74561	1.3614	1.60191	1.4577	1.52368	1.5712	1.56208	1.67788	1.68363	1.95648	1.74946	1.27112	1.50737	1.37157	1.33776	1.42634	1.42975	1.62379	1.54299	1.62681	1.81036	1.62283	1.71502	1.50072	1.4651	1.60945	1.63652	1.47362	1.59284	1.50803	1.48979
PE_FA	PE_FA 16:0	1.53627	1.94914	1.82167	1.67002	1.52311	1.66557	1.47778	1.45216	2.27772	2.48135	2.20973	1.95877	2.77144	2.46678	2.71828	2.47304	2.00627	1.74742	2.25165	1.84723	1.56537	3.16233	2.65332	1.94011	1.96572	1.92324	1.88916	1.80698	1.86327	1.73788	1.78221	1.77727	1.22498	1.40829	1.1938	1.24911
PE_FA	PE_FA 16:1	0.691304	0.836404	0.898565	1.1661	1.37142	1.36074	1.12392	1.21398	0.872121	0.91026	0.926785	0.961307	0.856445	0.790158	1.17398	0.9435	1.30749	1.15499	1.18914	1.10981	1.15927	1.72603	1.47056	1.21128	0.778842	0.634447	0.781456	0.626287	0.733106	0.852417	0.902952	0.698641	0.727517	0.798318	0.845363	0.827021
PE_FA	PE_FA 17:0	4.2729	5.20338	4.65967	3.96952	3.16738	3.03296	3.24596	3.56866	2.10093	2.03573	2.31762	2.08364	2.23868	2.11711	2.10893	1.94286	2.17738	2.46959	2.50304	2.49502	2.19315	2.17435	2.435	2.63005	3.09538	2.6963	2.86564	2.94816	3.20454	3.12281	3.20387	3.2235	3.63906	3.59352	3.8617	3.5133
PE_FA	PE_FA 17:1	5.02954	5.09813	5.45741	5.67206	9.32392	8.52205	7.9729	7.98587	8.54375	8.3664	8.26231	7.57058	8.66387	8.44685	8.38509	8.10112	9.27449	9.36124	8.97171	9.16999	7.00753	9.44396	8.87611	7.27368	4.48609	5.06035	4.66955	4.65209	6.17388	5.63953	4.92334	5.45186	7.95916	7.83572	7.68723	7.53702
PE_FA	PE_FA 18:0	3.75968	4.14552	3.91212	3.68369	2.23717	2.32652	2.40934	2.40224	3.20852	3.46302	2.7141	3.22927	3.90405	3.82349	3.62094	3.82404	2.51488	2.74536	2.58139	2.71061	2.57657	2.62305	2.64143	2.80562	2.94639	2.79745	3.13561	3.15825	3.15847	3.33225	3.14776	3.26378	2.41183	2.55495	2.49598	2.26535
PE_FA	PE_FA 18:1	60.4883	57.5435	57.9999	60.6619	71.5889	71.8547	73.0388	71.5616	69.1373	69.2125	71.0831	70.8512	66.8425	67.6272	67.4771	68.2458	72.0346	70.6966	71.9919	71.925	74.9123	70.1214	70.9939	73.2176	69.7722	69.2948	69.314	69.9781	70.181	70.5495	71.1218	71.2652	72.6504	71.9082	72.0455	72.9215
PE_FA	PE_FA 18:2	8.97649	9.32404	9.48417	8.96132	3.81014	3.91108	3.86094	4.3293	3.17317	3.00648	2.80715	2.98061	3.47742	3.35583	3.21255	3.21448	3.2872	3.39317	3.10788	3.19022	3.05335	2.95078	2.85863	3.11828	5.92793	6.06608	6.32622	5.84133	4.31235	4.39848	4.39013	4.04414	4.82615	4.99375	4.89283	4.80757
PE_FA	PE_FA 18:3	0.503433	0.487677	0.509929	0.493421	0.0609686		0.0688971	0.112476	0.177788		0.168986	0.14842	0.239289	0.171685	0.176491	0.189629	0.066634	0.0636713	0.0319892	0.0573524	0.0818457	0.0704548	0.110156	0.0931442	0.24486	0.264214	0.221949	0.249227	0.148389	0.158728	0.174179	0.124992	0.0430939	0.0603838	0.0710788	0.0682092
PE_FA	PE_FA 19:0	0.153084	0.124656	0.070915	0.0624802	0.109807	0.132399	0.106636	0.113359	0.0551066	0.0839892	0.066159	0.0551703	0.0724722	0.082142	0.0631443	0.0723047	0.0529456	0.107206	0.0915282	0.073106	0.0760094	0.0711043	0.0906082	0.0943746	0.0859236	0.0756986	0.0990477	0.0485791	0.0754283	0.0708103	0.083971	0.0884001	0.106005	0.0987902	0.0895907	0.0975632
PE_FA	PE_FA 19:1	2.38248	2.56132	2.60383	2.0942	3.50944	3.09136	2.81863	3.30467	2.86658	2.86542	2.43693	2.66824	2.87686	2.83804	2.51072	2.69411	3.05648	3.55578	3.04446	2.88116	2.56304	3.12679	3.0294	2.74302	2.21797	2.43323	2.29467	2.31547	2.35913	2.44935	2.23364	2.4124	3.2212	3.40617	3.46733	3.40971
PE_FA	PE_FA 20:0	0.0814087	0.0606456	0.054232	0.068562	0.0575372								0.0965955	0.0979671	0.124331	0.102858		0.0756843	0.0409702	0.0215909	0.0674326	0.0708466	0.0410296	0.0577118	0.0486131	0.043212	0.0620929	0.047653	0.0863325	0.069149	0.0773804	0.0238624
PE_FA	PE_FA 20:1	0.731962	0.712185	0.564468	0.572157	0.44145	0.517416	0.615215	0.5084	0.450521	0.489624	0.409151	0.483219	0.476183	0.443782	0.470804	0.431236	0.418396	0.474435	0.465959	0.474575	0.487346	0.350191	0.410247	0.476068	0.556642	0.458328	0.684696	0.519856	0.57239	0.481308	0.616463	0.630293	0.653641	0.681888	0.712652	0.65896
PE_FA	PE_FA 20:2	0.843021	0.925589	0.954291	0.696731	0.237523	0.341194	0.338836	0.324587	0.197001	0.210938	0.195218	0.188414	0.233541	0.219064	0.271607	0.20801	0.153281	0.175636	0.174185	0.20394	0.151217	0.144713	0.108163	0.189796	1.03051	0.952938	1.01993	0.97696	0.868947	0.81303	0.839456	0.763568	0.251247	0.256146	0.308436	0.290028
PE_FA	PE_FA 20:3	2.50747	2.63641	2.36364	2.63829	0.239666	0.369446	0.331434	0.275192	1.09145	0.893457	0.922174	1.09234	1.25715	1.33853	1.25161	1.30142	0.261733	0.286621	0.235723	0.314179	0.340655	0.301908	0.302028	0.285034	1.47209	1.41474	1.3281	1.47688	1.1839	1.05782	1.10853	1.11428	0.292971	0.266654	0.233495	0.267301
PE_FA	PE_FA 20:4	2.4376	2.17175	2.25658	2.18548	0.143206	0.244588	0.228546	0.239759	1.23672	1.20133	1.17313	1.03067	1.27717	1.46257	1.33403	1.47231	0.324891	0.437482	0.268754	0.412551	0.463603	0.39447	0.422617	0.464015	0.905738	0.943376	0.857957	0.912272	0.814401	0.673775	0.831575	0.666808	0.0933388	0.0947424	0.107172	0.0880585
PE_FA	PE_FA 20:5	3.60587	3.9128	3.97274	3.34744	0.627106	0.839379	0.936192	0.959149	3.05952	2.98875	2.69709	3.07787	3.03849	3.03523	3.14394	3.03387	1.74623	1.74771	1.67811	1.77591	1.87496	1.83783	1.93298	1.85725	2.83832	3.13123	2.82714	2.72683	2.76373	3.12804	2.95332	2.81449	0.371323	0.409289	0.442794	0.452075
PE_CLASS	PE_SFA	11.8026	13.7902	12.9345	11.5109	8.64625	8.90305	8.6011	9.13833	9.09997	9.58776	8.8788	8.88892	10.7611	10.2711	10.5921	10.1646	8.02259	8.65262	8.84014	8.48532	7.90487	9.53143	9.48518	9.07086	9.76884	9.34626	9.67438	9.72464	9.88876	9.798	9.90464	10.0133	8.85549	9.24839	9.1491	8.61511
PE_CLASS	PE_MUFA	69.3235	66.7515	67.5241	70.1665	86.2351	85.3463	85.5695	84.5746	81.8703	81.8442	83.1183	82.5345	79.7158	80.146	80.0177	80.4157	86.0915	85.2431	85.6632	85.5605	86.1295	84.7684	84.7803	84.9216	77.8117	77.8812	77.7443	78.0919	80.0195	79.9721	79.7982	80.4584	85.2119	84.6303	84.758	85.3542
PE_CLASS	PE_PUFA	18.8739	19.4583	19.5414	18.3227	5.11861	5.70569	5.76485	6.24047	8.93565	8.30095	7.96375	8.51833	9.52306	9.58291	9.39022	9.41972	5.83997	6.1043	5.49664	5.95414	5.96562	5.70016	5.73457	6.00752	12.4195	12.7726	12.5813	12.1835	10.0917	10.2299	10.2972	9.52828	5.87812	6.08096	6.05581	5.97324

## Sheet: Fig_3_and_7_Fig_Sup_1
Figure 3-Figure supplement 1 and Figure 7-Figure suppmement 1 Lipidomics Dataset.
	Replicate	2	2	2	2	2	2	2	2	2	2	2	2	2	2	2	2	2	2	2	2	2	2	2	2	2	2	2	2	2	2	2	2	2	2	2	2
	Condition	N2	N2	N2	N2	fat-2(wa17)	fat-2(wa17)	fat-2(wa17)	fat-2(wa17)	fat-2(et65)	fat-2(et65)	fat-2(et65)	fat-2(et65)	fat-2(wa17);egl-9(et60)	fat-2(wa17);egl-9(et60)	fat-2(wa17);egl-9(et60)	fat-2(wa17);egl-9(et60)	fat-2(wa17);hif-1(et69)	fat-2(wa17);hif-1(et69)	fat-2(wa17);hif-1(et69)	fat-2(wa17);hif-1(et69)	fat-2(wa17);ftn-2(et68)	fat-2(wa17);ftn-2(et68)	fat-2(wa17);ftn-2(et68)	fat-2(wa17);ftn-2(et68)	fat-2(wa17) LA	fat-2(wa17) LA	fat-2(wa17) LA	fat-2(wa17) LA	fat-2(wa17) LA to NGM	fat-2(wa17) LA to NGM	fat-2(wa17) LA to NGM	fat-2(wa17) LA to NGM	fat-2(wa17) 25C	fat-2(wa17) 25C	fat-2(wa17) 25C	fat-2(wa17) 25C
	Alt name	N2 s2	N2 s2	N2 s2	N2 s2	fat-2 NGM s2	fat-2 NGM s2	fat-2 NGM s2	fat-2 NGM s2	34.2 s2	34.2 s2	34.2 s2	34.2 s2	5.7 s2	5.7 s2	5.7 s2	5.7 s2	25.7 s2	25.7 s2	25.7 s2	25.7 s2	28.1 s2	28.1 s2	28.1 s2	28.1 s2	fat-2 LA s2	fat-2 LA s2	fat-2 LA s2	fat-2 LA s2	fat-2 LA to NGM s2	fat-2 LA to NGM s2	fat-2 LA to NGM s2	fat-2 LA to NGM s2	fat-2 25C s2	fat-2 25C s2	fat-2 25C s2	fat-2 25C s2
	Sample ID	Sample53	Sample54	Sample55	Sample56	Sample77	Sample78	Sample79	Sample80	Sample57	Sample58	Sample59	Sample60	Sample61	Sample62	Sample63	Sample64	Sample69	Sample70	Sample71	Sample72	Sample73	Sample74	Sample75	Sample76	Sample81	Sample82	Sample83	Sample84	Sample85	Sample86	Sample87	Sample88	Sample89	Sample90	Sample91	Sample92
TYPE	SPECIES
PC_FA	PC_FA 15:0	1.57648	0.87869	0.608618		0.407197	0.561759	0.535164	0.842428	0.313553	0.331275	0.377478	0.0659928	0.92958	0.754355	0.656427	0.631886	0.581134	0.516259	0.422752	0.654091	0.347978	0.415016	0.516608	0.373678	0.476387	0.712022	0.452347	0.269239	0.400303	0.458855	0.570329	0.411144	0.637492	0.690385	0.49397	0.648907
PC_FA	PC_FA 16:0	1.89863	1.75083	1.53917	1.11602	0.678747	0.617753	0.625658	0.516279	0.564226	1.58722	0.803795	0.792288	0.828085	1.22788	1.03046	1.30019	0.74412	0.502203	0.939802	0.518782	0.689951	0.911167	0.604723	0.845942	1.09199	0.613512	0.685629	0.959517	0.958449	1.09767	0.906812	0.736043	0.512972	0.459651	0.241444	0.455771
PC_FA	PC_FA 16:1	0.701852	0.073338	0.318292	0.323554	0.735935	0.744221	0.71023	1.00662	1.13574	0.738732	0.930453	0.524603	0.655398	0.769088	0.870987	0.758382	0.476056	1.15512	0.850218	0.946231	0.570014	0.904103	0.744356	0.950926	0.162986	0.450876	0.520629	0.843993	0.388418	0.891591	0.719816	0.735641	1.06598	0.858049	0.965032	1.07761
PC_FA	PC_FA 17:0	1.71159	1.40685	1.46562	0.672844	0.998831	1.16858	1.18642	0.995568	1.25626	1.55091	1.74051	0.714966	1.39554	1.13246	1.26903	1.1317	0.993882	1.39178	1.16912	1.73821	0.889299	1.22002	1.22376	0.805382	0.971054	1.17211	1.75735	1.34119	1.0647	1.16819	0.881962	1.36863	1.87071	1.77356	1.75975	2.00903
PC_FA	PC_FA 17:1	9.16537	8.61024	8.35853	8.52271	5.54966	5.67465	5.81168	5.08761	5.44231	8.25828	5.16002	6.83243	6.43737	8.1032	7.57748	6.8862	6.26298	6.23767	7.32316	7.20951	7.84545	6.34986	7.32068	8.4155	4.24139	3.94841	4.51304	3.16615	4.71141	5.5071	5.55077	5.09233	6.21152	5.77084	5.60288	5.39872
PC_FA	PC_FA 18:0	2.6552	2.90137	2.81173	2.29637	1.15696	0.983427	1.18847	1.09647	2.46576	2.31939	1.88105	2.95377	2.16876	1.92835	2.006	2.68934	2.2966	1.40446	1.58771	2.22502	1.32635	2.03135	1.35003	1.71874	1.92221	1.86652	1.63923	2.69058	1.86489	1.08307	2.13007	1.97638	1.39178	1.43914	1.4202	1.09444
PC_FA	PC_FA 18:1	34.9847	33.8233	33.7021	38.0789	68.837	67.3243	65.7563	69.7049	61.7116	53.2802	56.5334	62.1764	55.5679	53.584	50.8671	57.4772	68.8349	69.4296	67.0213	67.6207	65.6747	65.9226	64.9494	62.7001	63.7127	65.084	64.408	67.3913	67.8693	68.2439	64.2946	66.6162	68.1598	71.0313	69.7445	70.1759
PC_FA	PC_FA 18:2	6.33487	7.45662	7.16737	6.66994	11.0102	12.0066	13.0815	11.734	5.03741	4.00631	5.83283	4.32879	7.36279	7.22561	7.33559	6.89549	6.19806	8.09115	8.11572	9.31157	6.92218	7.3366	7.76816	7.88407	5.60752	6.44061	5.8564	5.59102	5.97334	6.05612	6.70463	5.9202	11.6739	10.5709	12.2436	11.3213
PC_FA	PC_FA 18:3	2.43895	3.951	3.15025	2.86468	0.251544	0.331402	0.367784	0.274131	0.903427	1.45157	0.737884	0.591594	0.913089	1.15294	1.13348	0.976107	0.496416	0.462318	0.341485	0.163723	0.369439	0.4439	0.666835	0.520995	1.23324	1.16717	1.63405	1.26257	0.186822	0.512155	0.477547	0.578608	0.359357	0.290231	0.249264	0.237189
PC_FA	PC_FA 19:1	3.68416	3.54787	4.40626	3.58123	6.40106	6.44639	6.34801	5.17325	2.34829	4.02395	3.89943	2.44146	3.35653	3.9692	4.97782	3.56825	4.76507	4.32368	5.48427	4.73481	5.58902	4.87627	5.62476	5.81284	2.15728	2.79975	2.22005	2.28874	2.65771	2.07363	2.91572	3.51867	6.42016	5.55186	6.23889	6.06616
PC_FA	PC_FA 20:2	0.129231		0.256018	0.250761	0.831451	0.903104	0.932803	0.818679	0.103978	0.0486227	0.138755		0.198861	0.194973	0.263921	0.0603867	0.395888	0.314612	0.183842	0.272321	0.346753		0.284094	0.154636	0.525214	0.524522	0.682941	0.122183	0.263101	0.176307	0.500141	0.412637	0.566893	0.477821	0.455255	0.612833
PC_FA	PC_FA 20:3	2.08047	2.64369	3.52424	2.87675	0.509496	0.435561	0.678308	0.663137	0.919622	1.18445	0.579223	0.346086	1.19769	1.24011	1.50511	0.406485	0.297804	0.154439	0.293596	0.378963	0.380707	0.341455	0.41201	0.506609	1.44419	1.02344	1.27625	1.16463	0.188226	0.472551	1.05207	0.966255	0.39414	0.306318	0.178165	0.316279
PC_FA	PC_FA 20:4	7.00437	7.4285	7.06119	6.6821	0.435112	0.548444	0.653302	0.321566	2.07312	3.05933	2.53663	2.11215	2.30784	3.29465	4.12088	1.84103	1.11035	0.613557	0.74579	0.437081	1.08021	1.10245	1.40555	1.1183	2.79985	2.32453	1.85027	1.55809	1.04272	1.26782	1.32399	0.878515	0.126727	0.13658	0.116769	0.0772439
PC_FA	PC_FA 20:5	25.6341	25.5277	25.6306	25.3701	2.19679	2.25378	2.12439	1.76532	15.7247	18.1597	18.8485	16.1195	16.6806	15.4232	16.3857	15.3773	6.54673	5.4032	5.52127	3.789	7.96798	7.95924	7.12906	8.1923	13.654	11.8726	12.5038	11.3508	12.4306	10.991	11.9715	10.7888	0.608551	0.643374	0.290238	0.508622
PC_CLASS	PC_SFA	7.84191	6.93774	6.42514	4.08523	3.24174	3.33152	3.53571	3.45075	4.5998	5.78879	4.80283	4.52702	5.32197	5.04304	4.96192	5.75312	4.61574	3.8147	4.11938	5.13611	3.25358	4.57756	3.69512	3.74374	4.46164	4.36417	4.53456	5.26053	4.28834	3.80778	4.48917	4.4922	4.41295	4.36273	3.91537	4.20814
PC_CLASS	PC_MUFA	48.5361	46.0547	46.7852	50.5064	81.5236	80.1896	78.6262	80.9724	70.6379	66.3012	66.5233	71.9749	66.0172	66.4255	64.2934	68.69	80.339	81.146	80.6789	80.5112	79.6792	78.0528	78.6392	77.8793	70.2743	72.283	71.6617	73.6902	75.6268	76.7163	73.4809	75.9628	81.8574	83.212	82.5513	82.7184
PC_CLASS	PC_PUFA	43.622	47.0075	46.7896	44.7143	15.2346	16.4789	17.8381	15.5768	24.7623	27.91	28.6738	23.4981	28.6608	28.5315	30.7447	25.5568	15.0452	15.0393	15.2017	14.3527	17.0673	17.1837	17.6657	18.3769	25.264	23.3528	23.8037	21.0493	20.0848	19.476	22.0299	19.545	13.7296	12.4253	13.5333	13.0734
PE_FA	PE_FA 15:0	2.3016	2.3512	2.39231	2.17189	1.37707	1.53792	1.5092	1.62167	1.84372	1.51993	1.8003	1.61494	2.02529	1.64317	1.78823	1.63888	1.63103	1.49474	1.51927	1.70619	1.45856	1.74626	1.60721	1.53981	1.7134	2.01619	2.0912	2.01504	1.65077	1.75774	1.68872	1.84693	1.61746	1.66779	1.93983	1.78889
PE_FA	PE_FA 16:0	2.44132	2.58513	2.73379	2.10111	1.68124	1.74342	1.66644	1.76944	2.08716	2.42539	2.21041	2.13533	2.17973	1.90257	2.25959	2.13722	1.98691	1.947	2.0324	1.85755	1.83014	2.16997	2.10718	2.11431	2.17459	1.91778	2.01105	1.85762	2.51089	1.98242	2.0607	2.11032	1.4599	1.57741	1.69339	1.41258
PE_FA	PE_FA 16:1	0.813873	0.713949	0.724861	0.881329	1.06388	1.08209	1.05067	1.162	1.01299	0.758039	0.844125	0.720106	0.790369	0.718894	0.768308	0.689899	0.734177	0.962613	0.90142	0.82768	0.760599	0.840722	0.681397	0.806262	0.634186	0.651989	0.598463	0.671747	0.859743	0.811738	0.819055	0.819556	0.723314	0.775629	0.782866	0.828383
PE_FA	PE_FA 17:0	3.36587	3.28447	3.34725	3.14879	3.36922	3.43639	3.43751	3.6145	2.69083	2.39506	3.3163	2.71723	2.71163	2.49272	2.72858	2.26725	2.40675	2.51564	2.86249	3.06593	2.26674	2.78417	2.63363	2.34209	2.94573	2.84803	2.80508	2.71579	2.86966	2.52136	2.82483	2.95402	4.47854	4.40037	4.66432	4.36255
PE_FA	PE_FA 17:1	8.37563	7.62391	7.9608	8.01807	9.17282	10.2937	9.76685	9.65699	6.45499	8.79039	7.5499	8.27932	6.84527	9.11648	9.20818	9.11488	10.1912	8.04724	10.1534	9.63535	9.67765	9.50878	10.1518	10.8106	4.39803	4.6801	4.36194	4.37053	7.33765	6.86945	7.00904	6.49866	8.25815	8.13301	8.94229	8.36154
PE_FA	PE_FA 18:0	3.86278	4.23375	4.08832	3.65785	2.2728	2.58886	2.46659	2.471	3.06127	3.56556	3.36606	3.45822	3.68942	3.35137	3.67566	3.24566	2.60163	2.66953	2.77833	2.60606	2.61046	2.97003	2.86026	3.00371	3.0383	3.18789	2.82732	3.19984	3.00638	2.97952	3.0418	3.17294	2.69648	2.73059	3.24824	2.56019
PE_FA	PE_FA 18:1	53.59	53.0362	52.6728	54.1179	68.2098	66.4921	67.2637	67.2986	71.4415	67.0293	67.1662	68.4337	69.2558	66.8645	65.1678	68.1324	69.3713	72.83	68.6234	69.3406	70.1951	68.7199	68.3219	68.0481	69.2978	69.478	70.2178	69.4541	69.579	71.385	70.3778	70.2463	69.1773	69.0923	67.3934	69.5635
PE_FA	PE_FA 18:2	9.7943	10.7153	10.5807	10.7934	5.80951	5.49412	5.37756	5.64897	2.9955	3.04028	3.27621	2.73875	3.39995	3.48287	3.71719	3.42103	3.24247	3.12465	3.57955	3.47164	3.06067	3.46305	3.2723	3.11549	6.14654	6.05144	5.84229	6.33284	4.01928	3.5708	3.83032	3.5916	5.83238	5.94323	5.76904	5.69898
PE_FA	PE_FA 18:3	0.624467	0.605364	0.620949	0.612648	0.0492541	0.0636798	0.0761561	0.0465317	0.134018	0.202444	0.241345	0.162513	0.151244	0.20225	0.196654	0.205584	0.0760651	0.0731646	0.0573952	0.050357	0.0757454	0.0995192	0.126104	0.0853259	0.287641	0.294476	0.239572	0.293009	0.127232	0.105446	0.131866	0.120154	0.0747174	0.084445	0.0615939	0.0642984
PE_FA	PE_FA 19:0	0.0714798	0.0824682	0.0717236	0.102847	0.120091	0.147955	0.127649	0.143523	0.0986451	0.0888256	0.102684	0.0889609	0.104676	0.090999	0.119967	0.0955347	0.083104	0.0776962	0.0833006	0.0914304	0.0815677	0.083961	0.0787621	0.0551383	0.0643792	0.0531613	0.0783371	0.0602389	0.0346312	0.0465374	0.0507623	0.0601224	0.113703	0.113214	0.188728	0.134492
PE_FA	PE_FA 19:1	3.04067	3.0008	3.16685	2.89565	4.23057	4.33952	4.36923	4.00472	2.25602	3.46032	3.24968	3.13839	2.39597	3.42222	3.50454	3.3998	3.9614	2.8328	3.94729	3.7977	3.83568	3.43709	3.99816	3.89198	1.9898	1.93719	1.99876	1.96599	2.37014	2.43505	2.61143	2.68734	3.83117	3.73213	3.69567	3.52826
PE_FA	PE_FA 20:0					0.0556263	0.0444812	0.0458396	0.0723619					0.100379	0.0710938	0.0906363	0.0608844	0.0496964	0.0524325	0.0530764	0.0581368	0.0384062	0.0530065	0.0680401	0.055046	0.0884409	0.0536018	0.0663092		0.0613811	0.0539266	0.0376594	0.0163382	0.0498969	0.0496895	0.0602199	0.0594692
PE_FA	PE_FA 20:1	0.532794	0.516398	0.550244	0.525942	0.481677	0.460788	0.478685	0.350209	0.48018	0.52858	0.548177	0.417062	0.633238	0.440483	0.510928	0.395768	0.512707	0.527335	0.514987	0.520672	0.445152	0.512308	0.473009	0.44251	0.523588	0.558229	0.511276	0.463925	0.388715	0.506706	0.551507	0.558783	0.640452	0.668554	0.600942	0.655932
PE_FA	PE_FA 20:2	0.617158	0.571251	0.693295	0.556047	0.350906	0.456992	0.466521	0.357292	0.199644	0.233227	0.224062	0.169854	0.299578	0.252296	0.288862	0.212244	0.19384	0.20304	0.209945	0.254533	0.156179	0.18085	0.196238	0.171854	1.16165	1.05623	1.19103	1.17174	0.594299	0.742976	0.720631	0.684011	0.274743	0.24807	0.258053	0.250892
PE_FA	PE_FA 20:3	3.64837	3.30688	3.29145	3.39953	0.396045	0.428618	0.473479	0.411926	1.05945	1.24546	1.26663	1.12023	1.24088	1.35079	1.47473	0.9256	0.370669	0.333753	0.333302	0.350369	0.531891	0.481922	0.45041	0.383279	1.55876	1.54321	1.47471	1.58885	0.86036	0.929297	0.998215	0.982202	0.266071	0.276718	0.225224	0.267734
PE_FA	PE_FA 20:4	2.92389	3.14615	2.86131	2.93677	0.315922	0.32905	0.348305	0.306556	1.05792	1.22275	1.29111	1.20082	1.30421	1.56993	1.49213	1.33539	0.518866	0.422109	0.489895	0.458664	0.648275	0.649006	0.646069	0.67647	1.04278	0.98244	1.00251	1.02621	0.591082	0.706945	0.683992	0.849212	0.097385	0.0993683	0.0794373	0.0688101
PE_FA	PE_FA 20:5	3.89307	4.16015	4.15935	4.01955	1.04355	1.06028	1.07558	1.06365	3.05427	3.42744	3.46694	3.53857	2.87232	3.02735	3.00801	2.72199	2.06812	1.88628	1.86054	1.90716	2.32721	2.29948	2.3275	2.45802	2.93441	2.69004	2.68231	2.71365	3.13876	2.59508	2.56166	2.80152	0.408312	0.40744	0.396732	0.393523
PE_CLASS	PE_SFA	12.043	12.537	12.6334	11.1825	8.87606	9.49902	9.25324	9.6925	9.78163	9.99477	10.7958	10.0147	10.8111	9.55192	10.6627	9.44543	8.75913	8.75705	9.32886	9.38529	8.28587	9.8074	9.35508	9.11011	10.0248	10.0766	9.8793	9.84853	10.1337	9.3415	9.70448	10.1607	10.416	10.5391	11.7947	10.3182
PE_CLASS	PE_MUFA	66.3529	64.8913	65.0756	66.4389	83.1588	82.6682	82.9292	82.4726	81.6456	80.5666	79.3581	80.9885	79.9207	80.5626	79.1598	81.7327	84.7708	85.1999	84.1405	84.122	84.9142	83.0188	83.6263	83.9995	76.8434	77.3055	77.6883	76.9263	80.5353	82.008	81.3688	80.8106	82.6304	82.4017	81.4152	82.9376
PE_CLASS	PE_PUFA	21.5012	22.5051	22.207	22.3179	7.96519	7.83274	7.81761	7.83493	8.5008	9.37161	9.76629	8.93072	9.26817	9.88548	10.1776	8.82184	6.47004	6.043	6.53062	6.49273	6.79996	7.17383	7.01862	6.89043	13.1318	12.6178	12.4324	13.1263	9.33101	8.65054	8.92669	9.0287	6.95361	7.05927	6.79008	6.74423
