# Supplementary material for: Forward genetics in C. elegans reveals genetic adaptations to polyunsaturated fatty acid deficiency
Source: eLife. 2025 Jul 8;13:RP104181. doi: 10.7554/eLife.104181 (PMC12237404; doi:10.7554/eLife.104181)
Supplement: Supplementary file 1. [file elife-104181-supp1.xlsx]

## Sheet: Supplementary File 1
Supplementary File 1. fat-2(wa17) suppressor genotyping primers.
Allele	Primer	Sequence	Expected product	Annealing temperature
fat-2(wa17)	Fwd	5' GACAATCGCTACAAAAGTG 3'	320	55°C
	WT Rev	5' CATTGAGCCATTCATAATTGG 3'
	Mut Rev	5' CATTGAGCCATTCATAATTGA 3'
fat-2(et63)	Fwd	5' AGGTACCGGAGCTTCCATTAG 3'	558	55°C
	WT Rev	5' AGGTACCGGAGCTTCCATTAA 3'
	Mut Rev	5' TGACACGATCCTCAGTAGTCTC 3'
fat-2(et64-et66)	Fwd	5' CATGACTGTGGACATGGGTC 3'	334	55°C
	WT Rev	5' CATGACTGTGGACATGGGTT 3'
	Mut Rev	5' TGACACGATCCTCAGTAGTCTC 3'
egl-9(et60-et61)	Fwd	5' TGCCAGTCTTCCGTCGTCG 3'	739	55°C
	WT Rev	5' ATGCCAGTCTTCCGTCGTCA 3'
	Mut Rev	5' CGAACGACAAAACCGCGAAC 3'
egl-9(et62)	Fwd	5' CATGCCAGTCTTCCGTCGTC 3'	741	55°C
	WT Rev	5' CATGCCAGTCTTCCGTCGTT 3'
	Mut Rev	5' CGAACGACAAAACCGCGAAC 3'
ftn-2(et67)	Fwd	5' AGCCAGAGAATGATGAGCGG 3'	763	55°C
	WT Rev	5' AGCCAGAGAATGATGAGCGA 3'
	Mut Rev	5' AAGCCTTCAAGGCGGTTCCC 3'
ftn-2(et68)	Fwd	5' ATGTCTCTCGCTCGTCAAAACT 3'	476	55°C
	WT Rev	5' AATAGAATAATCCTCACCTG 3'
	Mut Rev	5' AATAGAATAATCCTCACCTA 3'
hif-1(et69)	Fwd	5' GTGATTTCTTAACGTGTGTATTTTAG 3'	588	60°C
	WT Rev	5' GTGATTTCTTAACGTGTGTATTTTAA 3'
	Mut Rev	5' CATCATTGCTTCCGATGACTG 3'
