# Supplementary figures and images for: Forward genetics in C. elegans reveals genetic adaptations to polyunsaturated fatty acid deficiency
Source: eLife journal article supplement (doi:10.7554/elife.104181), 2024-12-20

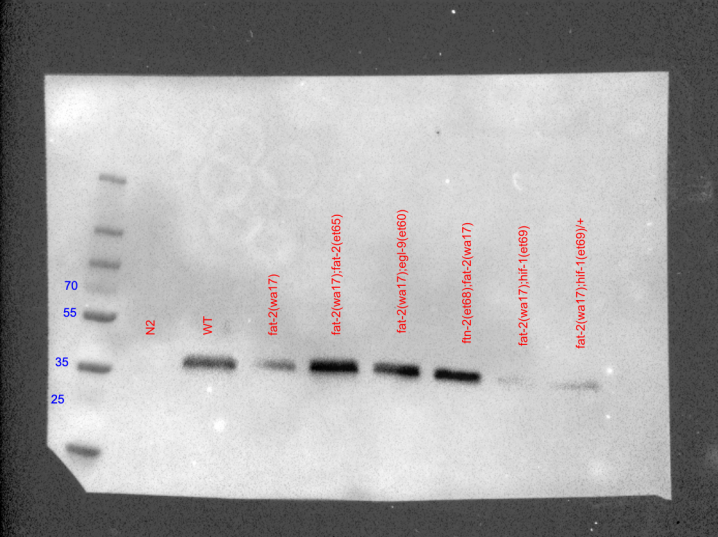

Supplement: fig6-data1 [file elife-104181-fig6-data1-v1.zip]

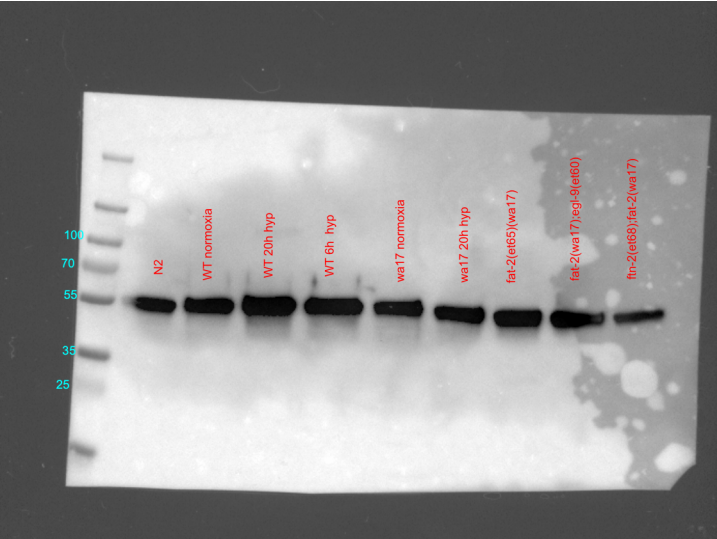

Supplement: fig6-data1 [file elife-104181-fig6-data1-v1.zip]

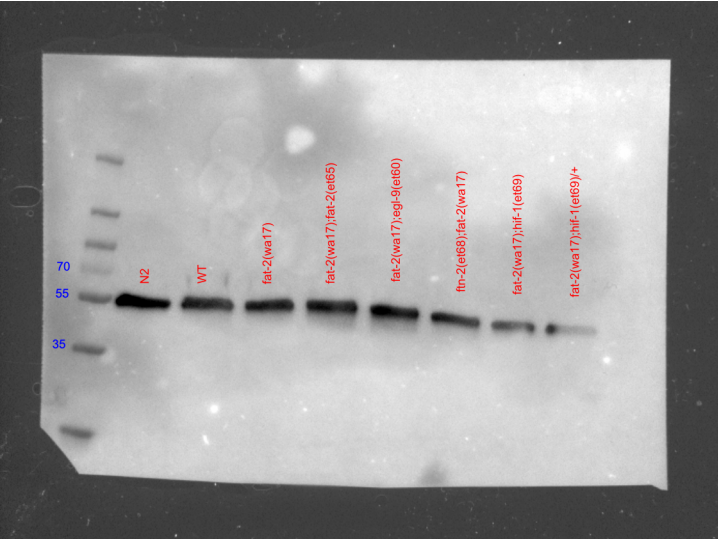

Supplement: fig6-data1 [file elife-104181-fig6-data1-v1.zip]

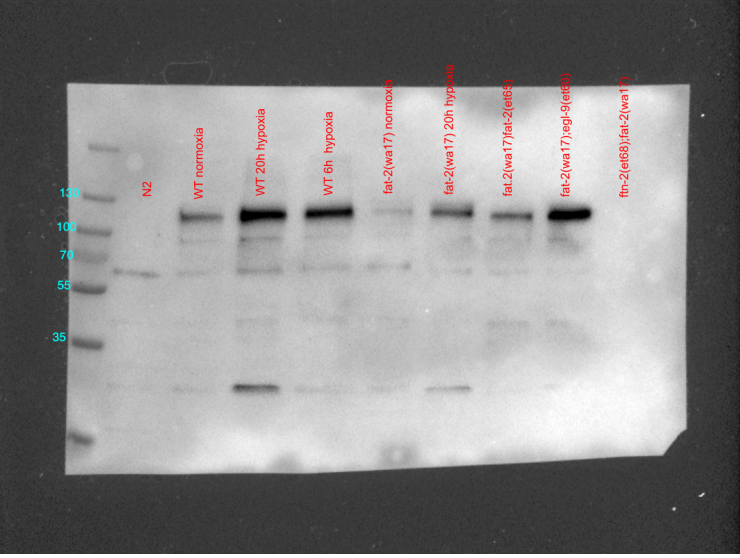

Supplement: fig6-data1 [file elife-104181-fig6-data1-v1.zip]

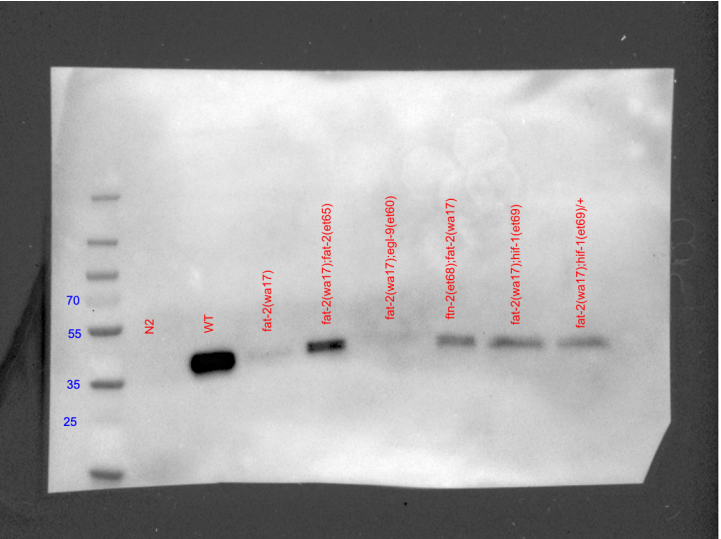

Supplement: fig6-figsupp1-data1 [file elife-104181-fig6-figsupp1-data1-v1.zip]

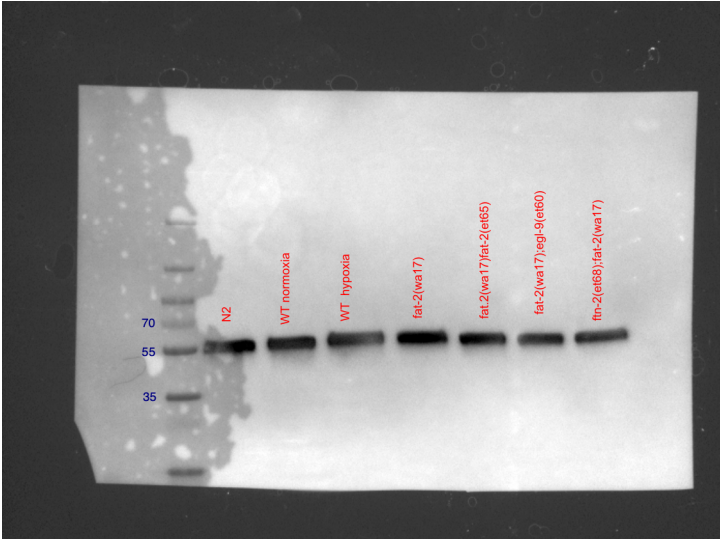

Supplement: fig6-figsupp1-data1 [file elife-104181-fig6-figsupp1-data1-v1.zip]

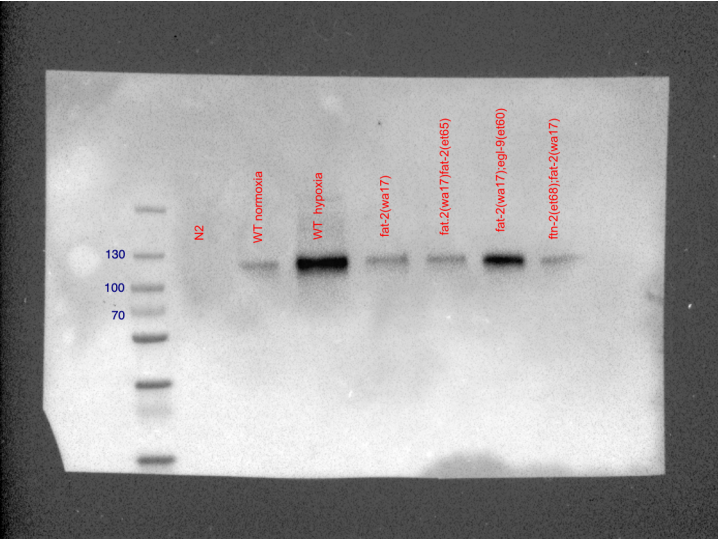

Supplement: fig6-figsupp1-data1 [file elife-104181-fig6-figsupp1-data1-v1.zip]

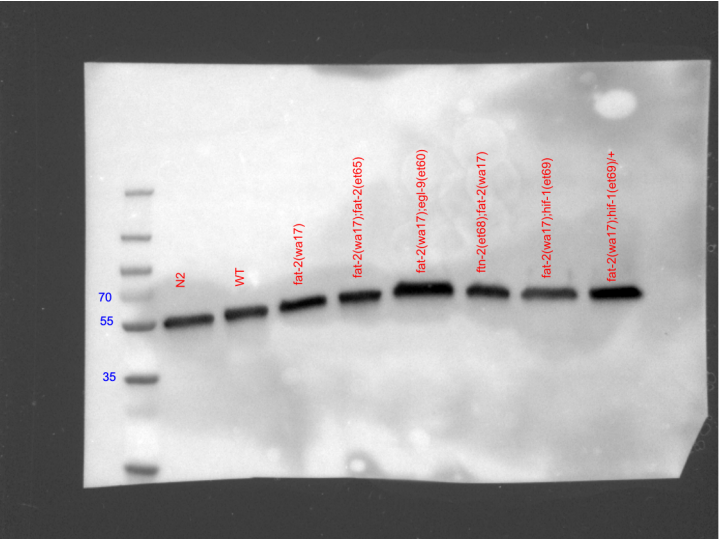

Supplement: fig6-figsupp1-data1 [file elife-104181-fig6-figsupp1-data1-v1.zip]
